# Supplementary material
Source: PubMed Central journal article supplement (PMC4213353)

### Gingivitis

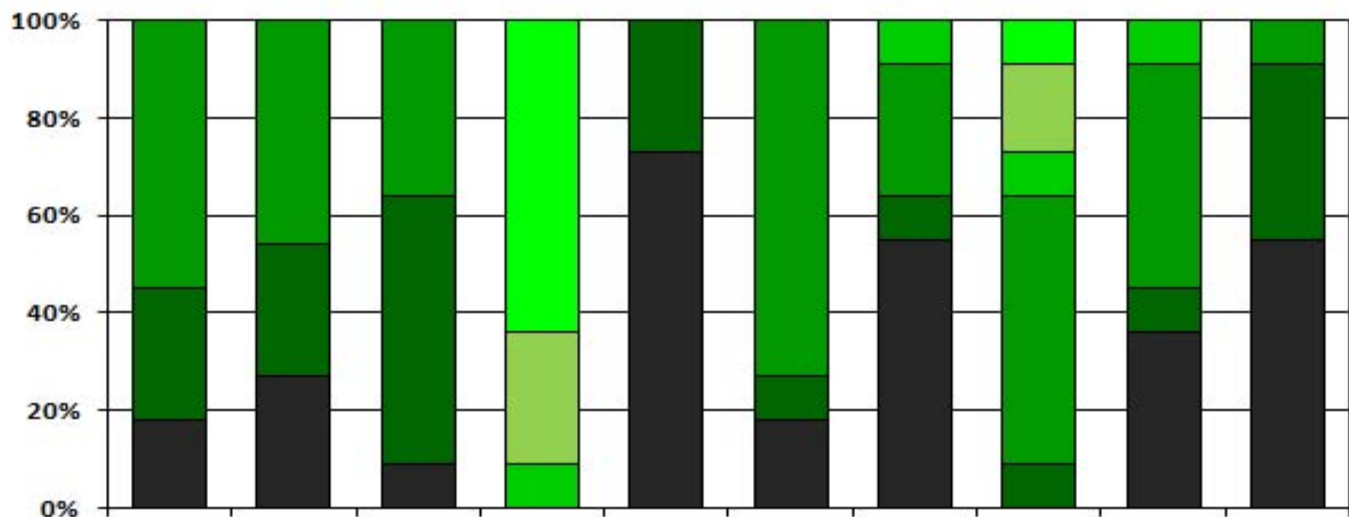

### Periodontal health

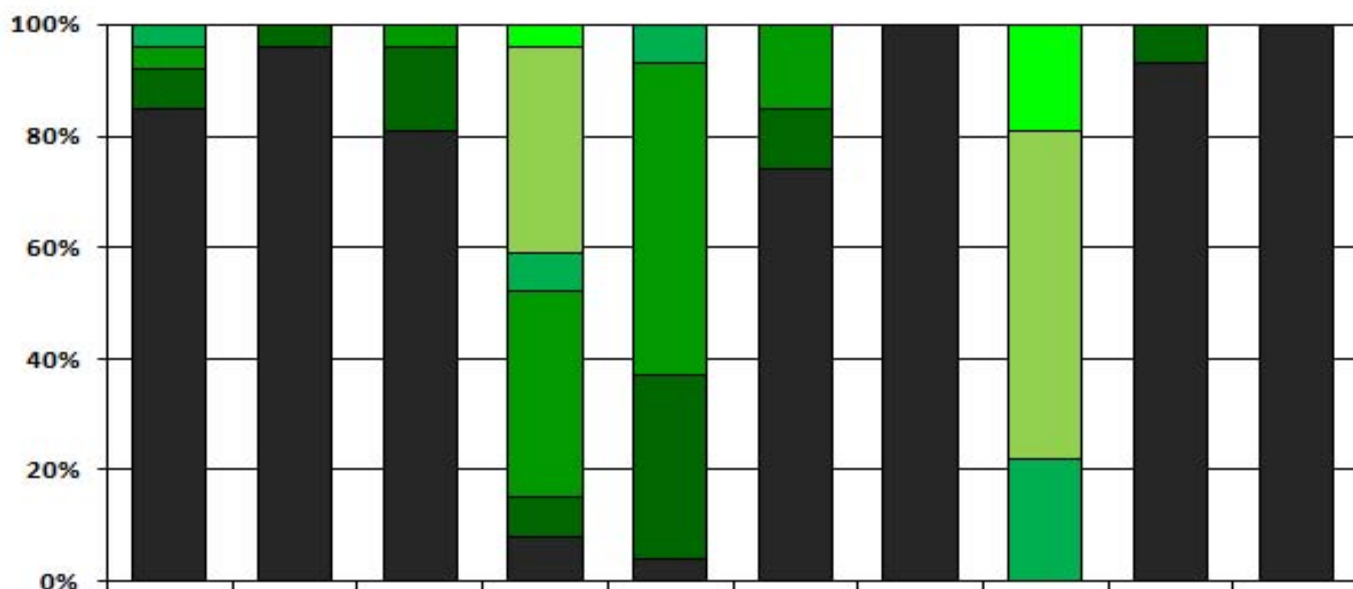

Bacteroidales G2.sp.\_HOT274\_AG14

C. curvus HOT580/C. rectus HOT748A

E.11 G6 nodatum\_HOT694

Fusobacterium Cluster

N. polysaccharea\_HOT737

P. micra\_HOT111\_V05

P. gingivalis\_HOT619\_AA93

S. oralis\_HOT707/Streptococcus\_sp.\_HOT064

T. forsythia\_HOT613

T. lecitinoliticum\_HOT653\_AB07

0

1

2

3

4

5

### Gingivitis

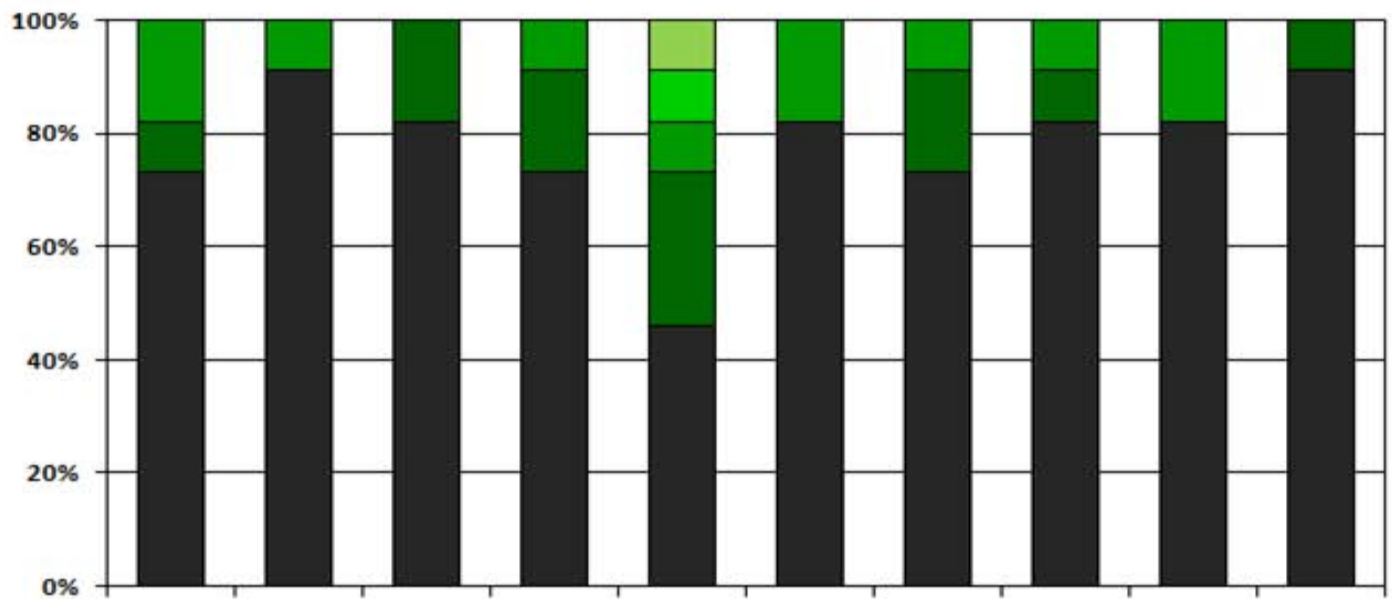

### Periodontitis

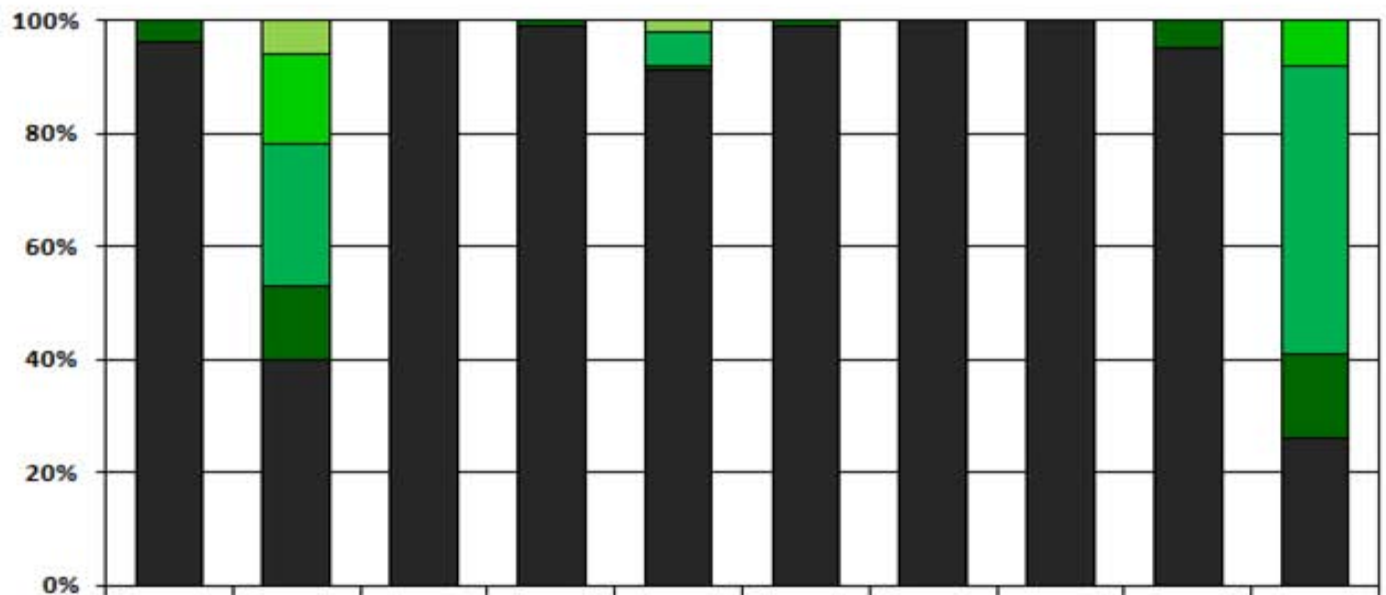

Actinomyces sp.\_HOT169\_AD85  
 D. pneumosintes\_HOT736\_X78  
 Haemophilus sp.\_HOT036\_X31  
 Prevotella sp.\_HOT317\_AH08  
 Pseudomonas Cluster  
 R. dentocariosa\_HOT587\_Q66  
 R. mucilaginosa\_HOT681\_AB62  
 S. australis\_HOT073\_AH33  
 S. infantis\_HOT638/Streptococcus sp.\_HOT065\_AH35  
 Treponema sp.\_HOT257\_AH45

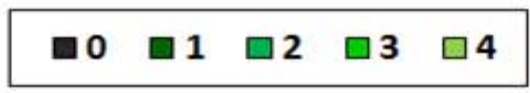

### Chronic Periodontitis

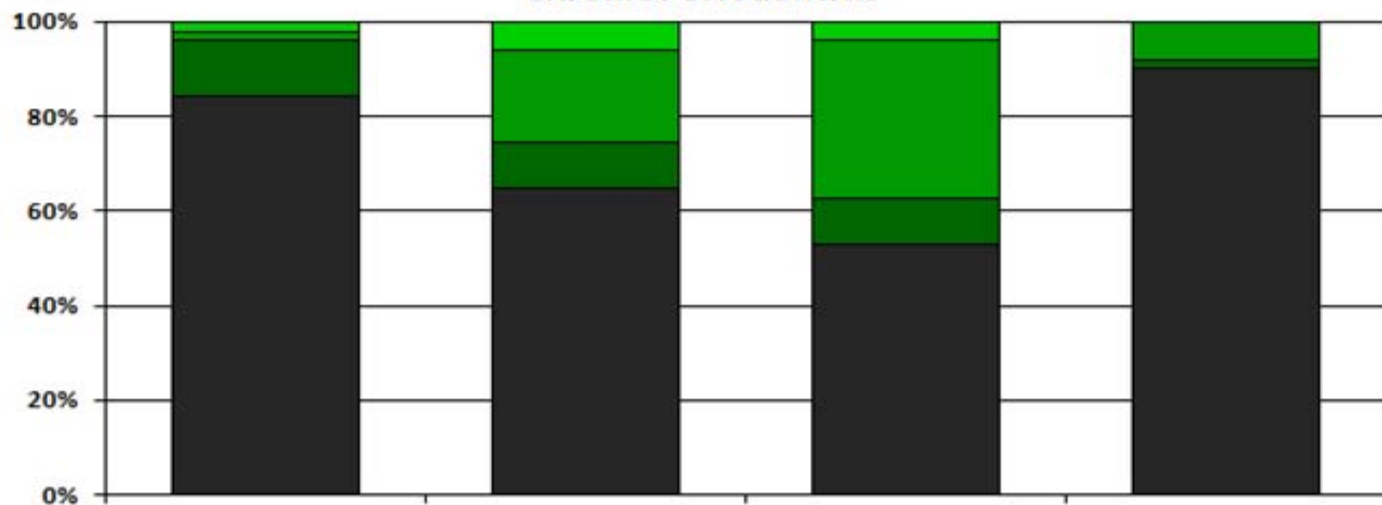

### Aggressive Periodontitis

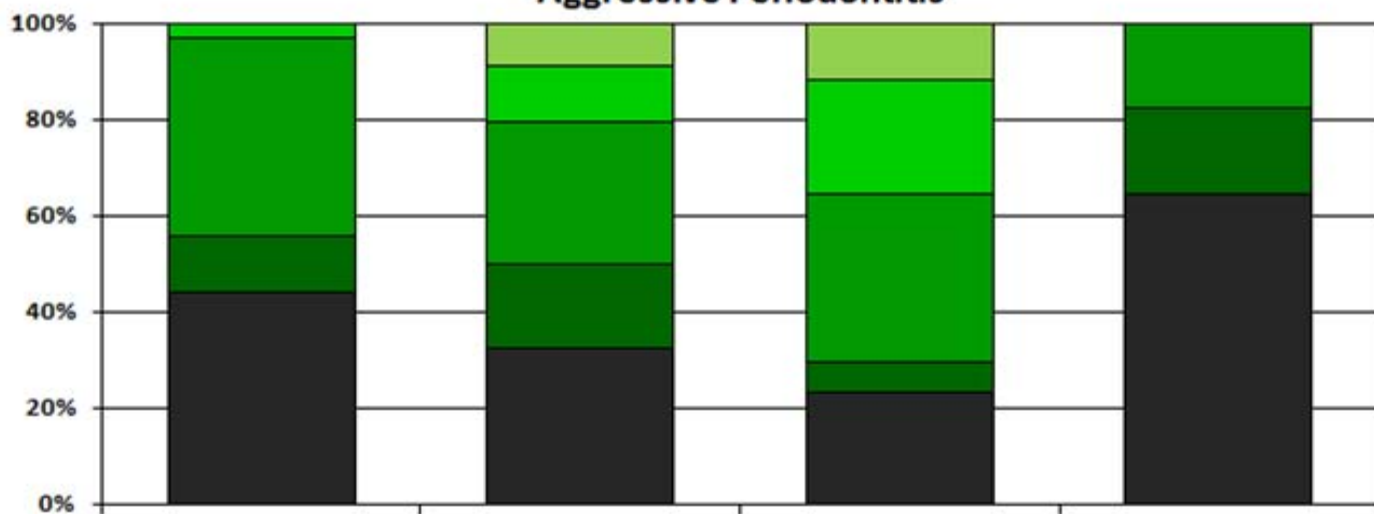

*A. actinomycetemcomitans*\_HOT531

*N. elongata*\_HOT598

*P. intermedia*\_HOT643\_AB92

*P. alactolyticus*\_HOT538\_AB69

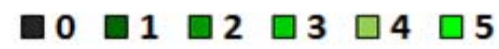

Supplement: NIHMS625485-supplement-Supp_FigureS1-S3.pdf [file NIHMS625485-supplement-Supp_FigureS1-S3.pdf]
